# Supplementary material for: p21-activated kinase 4 suppresses fatty acid β-oxidation and ketogenesis by phosphorylating NCoR1
Source: PubMed Central journal article supplement (PMC10435519; doi:10.1038/s41467-023-40597-z), 2023-08-17
Supplement: 41467_2023_40597_MOESM1_ESM.pdf [file 41467_2023_40597_MOESM1_ESM.pdf]

**p21-activated kinase 4 suppresses fatty acid  $\beta$ -oxidation and ketogenesis by phosphorylating NCoR1**

Min Yan Shi<sup>1</sup>, Hwang Chan Yu<sup>1</sup>, Chang Yeob Han<sup>2</sup>, In Hyuk Bang<sup>1</sup>, Ho Sung Park<sup>3</sup>, Kyu Yun Jang<sup>3</sup>, Sangkyu Lee<sup>4</sup>, Jeong Bum Son<sup>5</sup>, Nam Doo Kim<sup>5</sup>, Byung-Hyun Park<sup>1,\$</sup>, and Eun Ju Bae<sup>2,\$</sup>

<sup>1</sup>Department of Biochemistry and Molecular Biology, Jeonbuk National University Medical School, Jeonju 54896, Republic of Korea

<sup>2</sup>School of Pharmacy, Jeonbuk National University, Jeonju 54896, Republic of Korea

<sup>3</sup>Department of Pathology, Jeonbuk National University Medical School, Jeonju 54896, Republic of Korea

<sup>4</sup>School of Pharmacy, Sungkyunkwan University, Suwon 16419, Republic of Korea

<sup>5</sup>VORONOI BIO Inc., Incheon 21984, Republic of Korea

**Running title:** PAK4 inhibition facilitates ketogenesis

**Supplementary materials**

1. Supplementary Figures
2. Supplementary Tables

## 1. Supplementary Figures

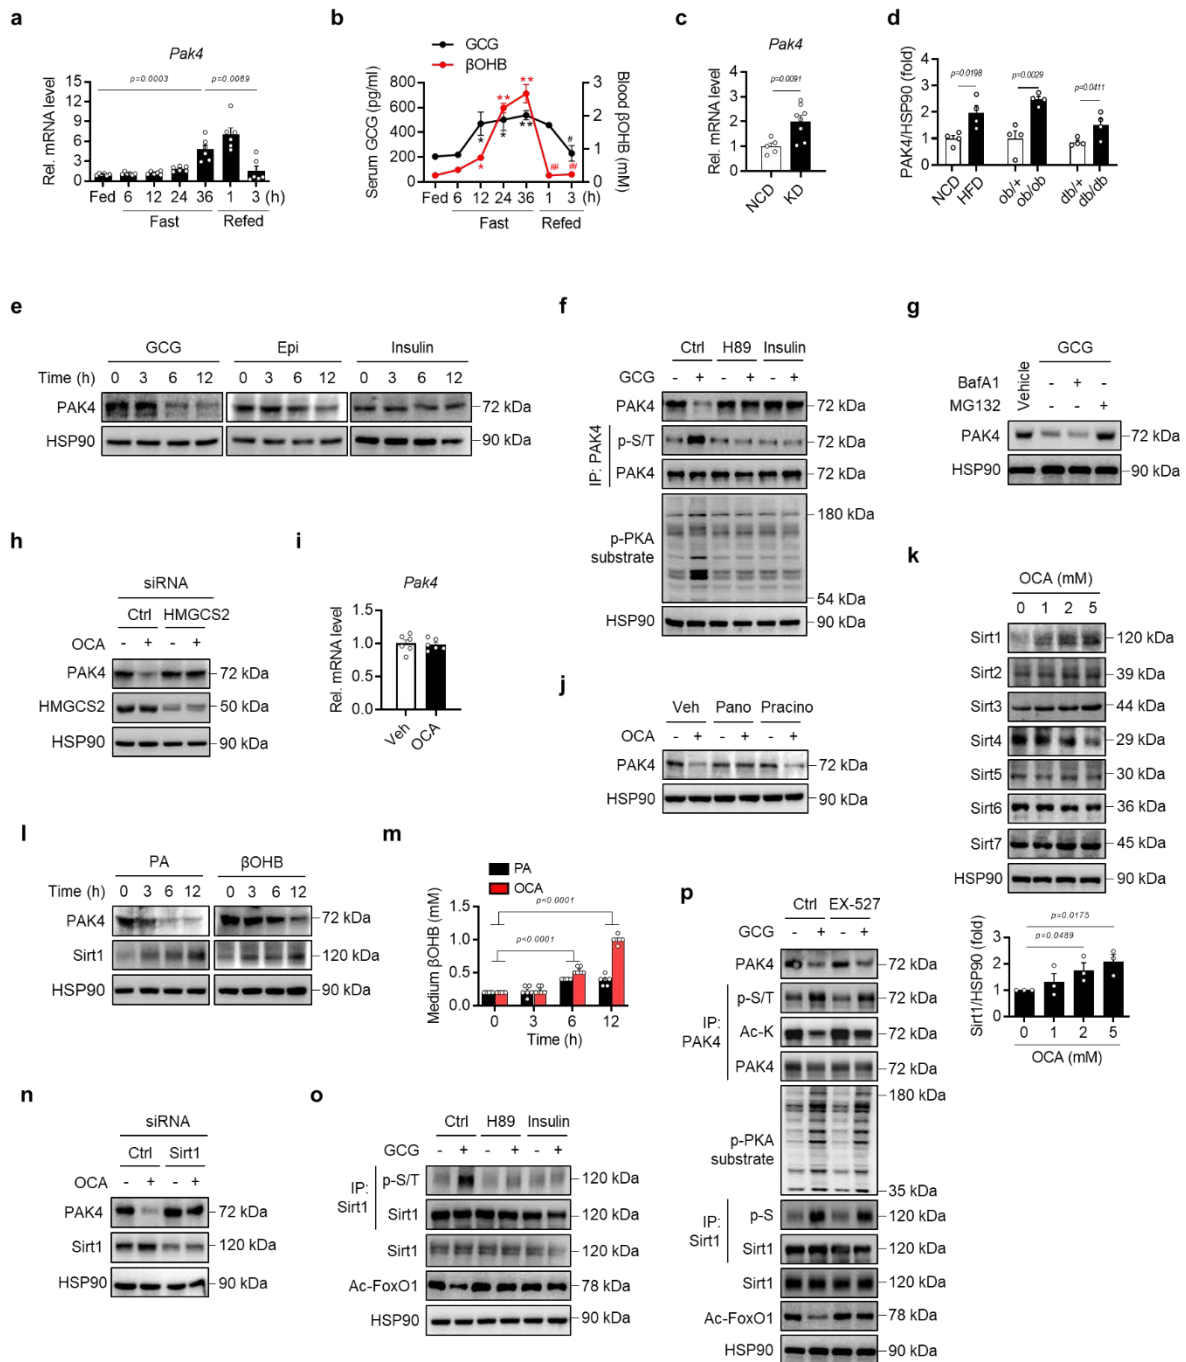

**Supplementary Figure 1. Regulation of PAK4 protein and mRNA levels under various conditions (compare to Figure 1).** **a, b.** Eight-week-old male C57BL/6 mice were fed either a normal chow diet (NCD) *ad libitum*, fasted for 6–36 h, or refeed for 1 or 3 h following a 36 h fast. Hepatic *Pak4* mRNA levels (**a**,  $n = 6$ ) and blood  $\beta$ -hydroxybutyrate ( $\beta$ OHB) and serum

glucagon (GCG) levels (b,  $n = 3$ ) were analyzed. \* $p < 0.05$  and \*\* $p < 0.01$  versus fed; # $p < 0.05$  and ## $p < 0.01$  versus fasted for 36 h. c. Eight-week-old male C57BL/6 mice were fed either a NCD or a ketogenic diet (KD) for 2 weeks, and hepatic *Pak4* mRNA levels were analyzed ( $n = 5$  for NCD and  $n = 8$  for KD). d. The protein densities in Fig. 1c were quantified ( $n = 4$ ). e. Mouse primary hepatocytes were treated with glucagon (100 nM), epinephrine (Epi, 100  $\mu$ M), or insulin (100 nM) for the indicated times for PAK4 immunoblotting. f. Primary hepatocytes were treated with glucagon (100 nM) for 12 h in the presence or absence of H89 (10  $\mu$ M) or insulin (100 nM). Cell lysates were immunoblotted for indicated proteins or immunoprecipitated with anti-PAK4 antibody followed by immunoblotting with anti-p-Ser/Thr (p-S/T) antibody. g. Primary hepatocytes were treated with glucagon (100 nM) for 12 h with or without MG132 (2  $\mu$ M) or bafilomycin A1 (BafA1, 100 nM), and PAK4 protein levels were assessed by Western blotting. h, i. Primary hepatocytes were transfected with siRNA targeting HMGCS2 (h) or left untransfected (i), followed by treatment with octanoate (OCA, 2 mM) for 12 h. Protein levels of PAK4 were analyzed by Western blotting, while mRNA levels were assessed using qPCR ( $n = 6$ ). j. Primary hepatocytes were treated with octanoate (2 mM) for 12 h in the presence or absence of panobinostat (pano, 10 nM) or pracinostat (pracino, 100 nM). Protein levels of PAK4 were determined by Western blotting. k. Primary hepatocytes were treated with indicated concentrations of octanoate for 12 h. Protein levels of sirtuins were determined by Western blotting ( $n = 3$ ). l, m. Primary hepatocytes were treated with palmitate (PA, 0.5 mM),  $\beta$ OHB (5 mM) for indicated time periods and the protein levels of PAK4 and Sirt1 were analyzed (l).  $\beta$ OHB release into culture medium in cells treated with palmitate or octanoate were compared (m,  $n = 6$ ). n. Primary hepatocytes were transfected with siRNA targeting Sirt1 and then treated with octanoate (2 mM) for 12 h. Protein levels of PAK4 were analyzed by Western blotting. o, p. Primary hepatocytes were treated with 100 nM glucagon for 12 h with or without either H89 (10  $\mu$ M), insulin (100 nM), or EX-527 (100 nM). Phosphorylation of Sirt1 and phosphorylation and acetylation of PAK4 were analyzed in

immunoprecipitates of each protein. p-PKA substrate and acetylated (Ac)-FoxO1 were measured as an indicator of PKA activation and Sirt1 deactivation, respectively. Data are presented as the mean  $\pm$  SEM. One-way ANOVA followed by Dunnett's multiple comparisons test (a, b, k, m) and unpaired two-tailed *t* test (c, d, i) were conducted for statistical analyses. Source data are provided as a Source Data file.

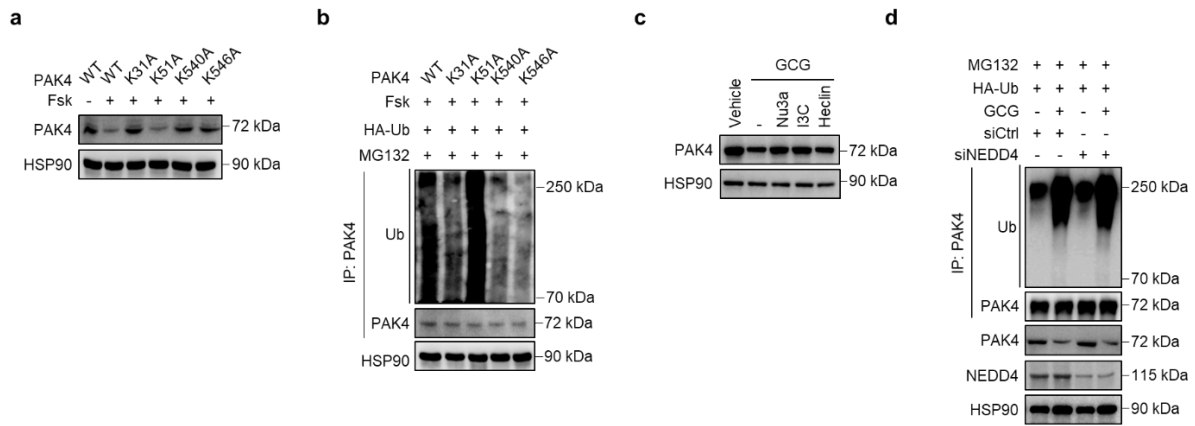

**Supplementary Figure 2. PAK4 degradation *via* ubiquitin-proteasome pathway (compare to Figure 1).** **a, b.** AML12 cells were transfected with wild type (WT) or lysine mutants of PAK4 (K31A, K51A, K540A, or S546A) and then treated with forskolin (Fsk, 10  $\mu$ M) for 12 h to compare protein degradation and ubiquitination of PAK4. **c.** Mouse primary hepatocytes were treated with glucagon (GCG, 100 nM) for 12 h with or without nutlin-3a (Nu3a, 10  $\mu$ M), indol-3-carbinol (I3C, 100  $\mu$ M), and heclin (100  $\mu$ M), and PAK4 protein levels were assessed by Western blotting. **d.** AML12 cells transfected with HA-Ub were treated with glucagon (100 nM) for 12 h in the presence or absence of siNEDD4. Cell lysates were immunoblotted for indicated proteins or immunoprecipitated with anti-PAK4 antibody followed by immunoblotting with anti-ubiquitin (Ub) antibody. Source data are provided as a Source Data file.

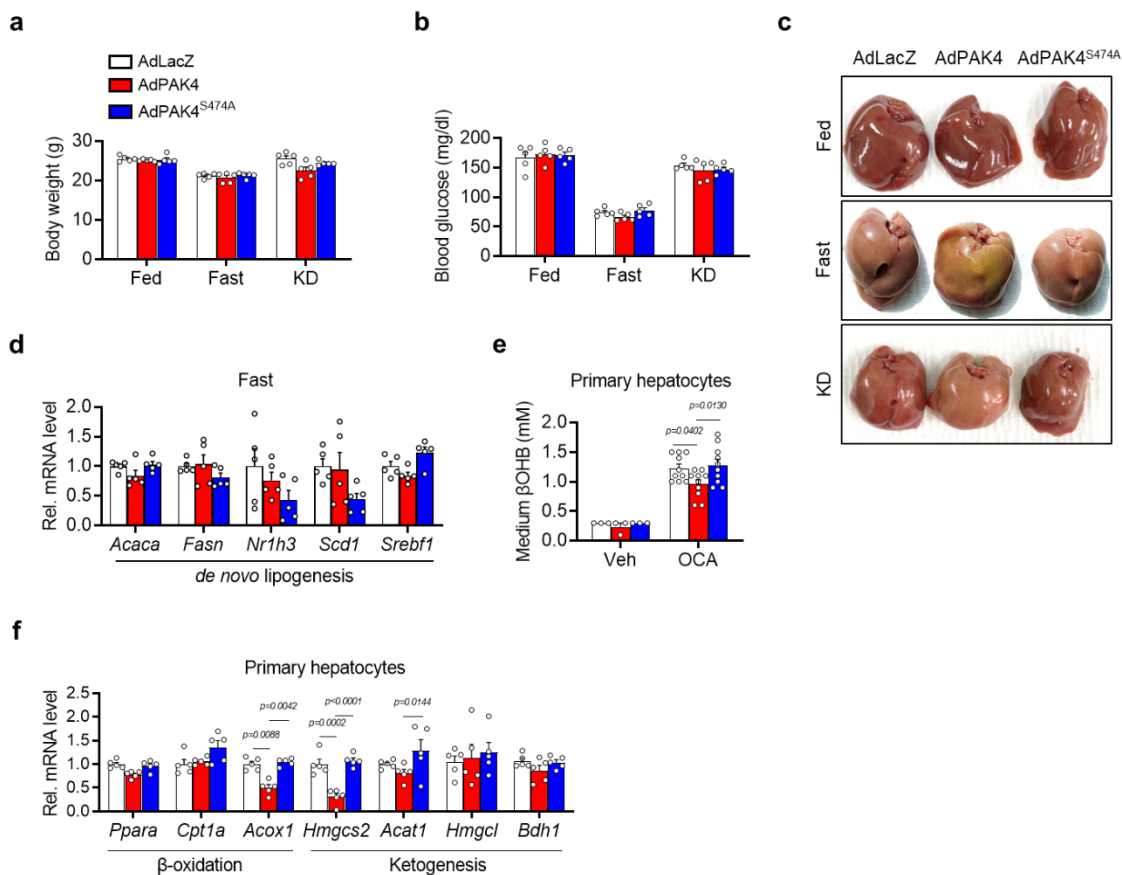

**Supplementary Figure 3. Worsening of hepatic fat accumulation by PAK4 overexpression (compare to Figure 2).** **a, b.** Body weight (*a*, *n* = 5) and blood glucose levels (*b*, *n* = 5) were determined in control and PAK4 overexpressing mice. **c.** Representative images of gross liver morphology. **d.** qPCR analyses of lipogenesis-related genes were performed on liver tissue obtained from fasted mice (*n* = 5). **e, f.** Mouse primary hepatocytes were infected with adenoviruses of PAK4 or PAK4<sup>S474A</sup>, and then treated with octanoate (OCA, 2 mM) for 24 h. The release of  $\beta$ OHB into the culture medium (*n* = 3 for Veh group and *n* = 10 for OCA group) and qPCR analysis of fatty acid  $\beta$ -oxidation and ketogenesis genes (*n* = 5) were determined. Data are presented as the mean  $\pm$  SEM. One-way ANOVA followed by Tukey's multiple comparisons test was conducted for statistical analyses (*a, b, d, e, f*). Source data are provided as a Source Data file.

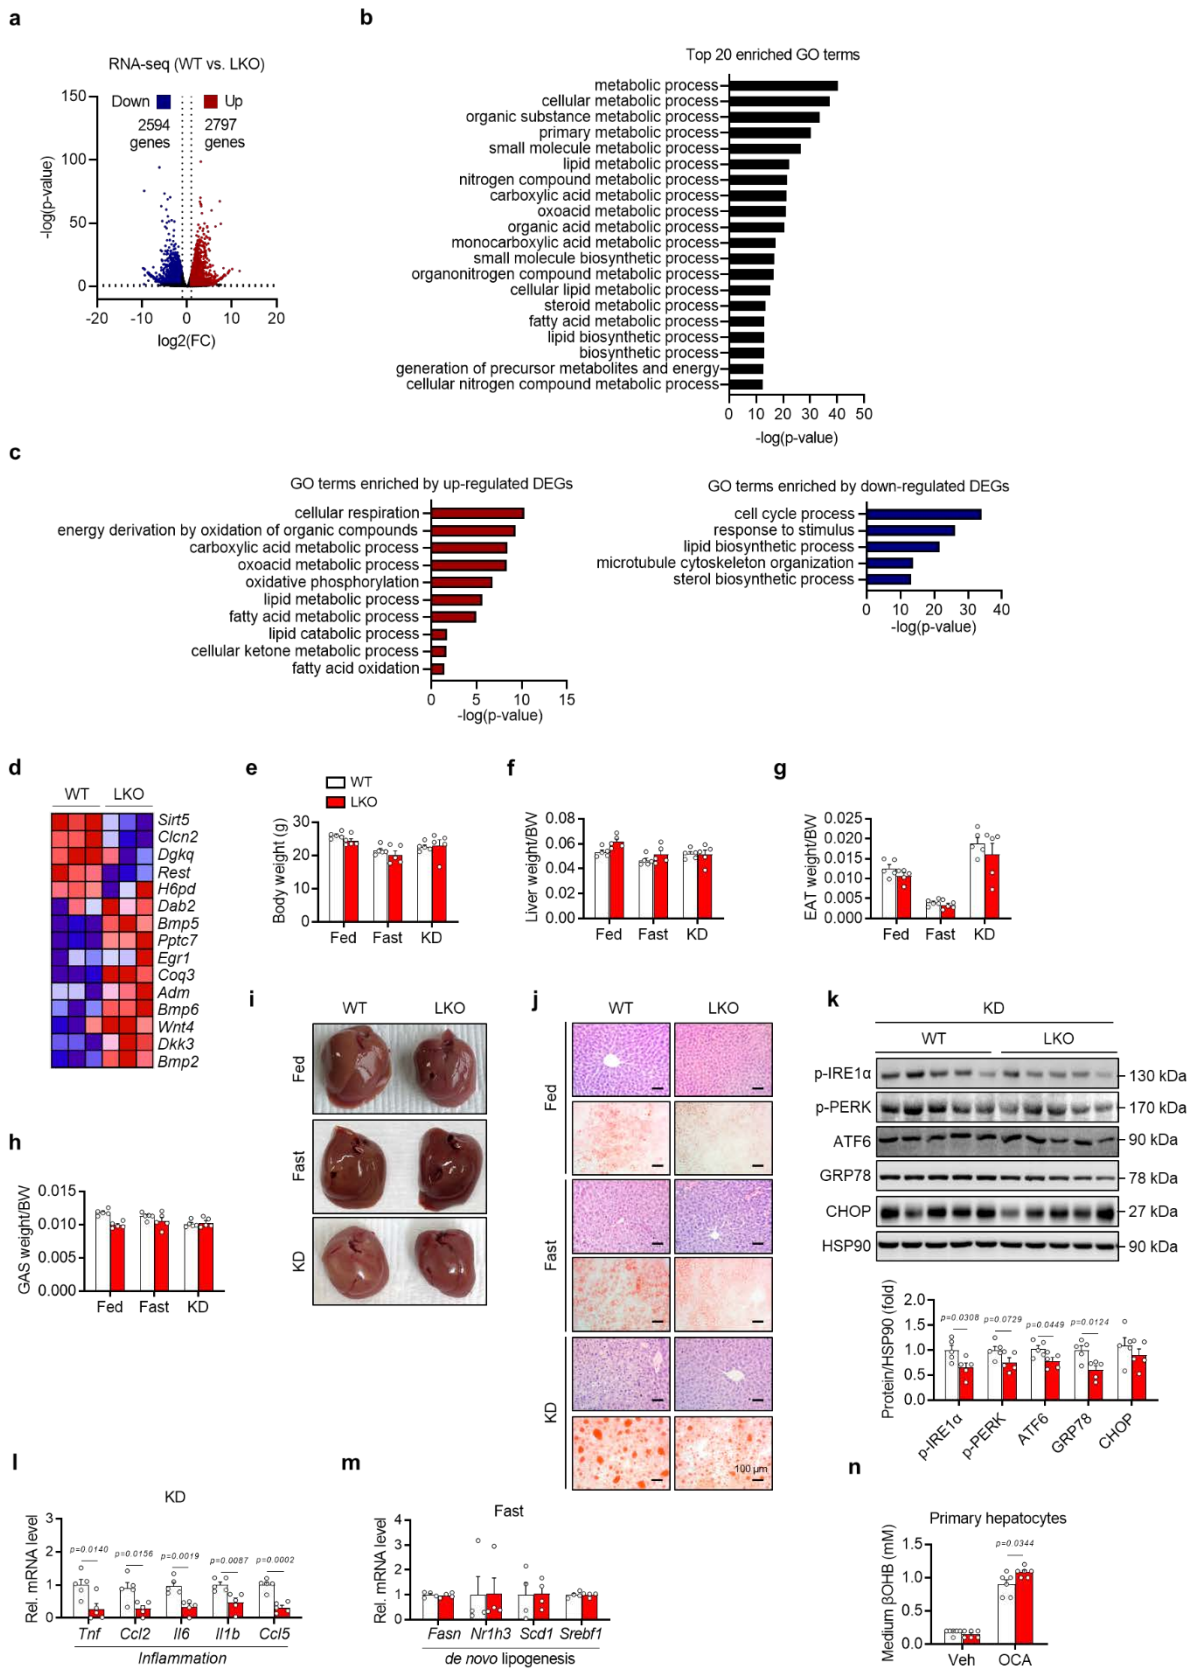

**Supplementary Figure 4. RNA sequencing analysis and metabolic profiles of *Pak4* LKO and WT mice (compare to Figure 3).** Eight-week-old male *Pak4* LKO and WT mice were fasted for 24 h and liver samples were subjected to RNA-Seq analysis. **a.** Volcano plot showing differentially expressed genes (DEGs) in the liver of *Pak4* LKO and WT mice. Blue and red dots represent downregulated or upregulated DEGs, respectively, based on fold-changes >2 for genes with  $p < 0.05$ . Each sample was analyzed in triplicate ( $n = 3$ ). Statistical analyses were conducted using a two-sided negative binomial Wald test. **b, c.** Gene ontology (biological process category) analyses of the total DEGs (b) and upregulated or downregulated DEGs (c) in the liver. Statistical significance was determined using adjusted  $p$ -values, which were obtained by conducting a one-sided hypergeometric test and then applying multiple testing corrections using the Benjamini-Hochberg FDR method. **d.** Heatmap of DEGs assigned to the ketone biosynthetic process. **e-h.** Weights of the body (e,  $n = 5$ ), liver (f,  $n = 5$ ), epididymal adipose tissue (EAT) (g,  $n = 5$ ), and gastrocnemius muscle (GAS) (h,  $n = 5$ ). **i, j.** Gross liver morphology (i) and hematoxylin and eosin (H&E) and Oil Red O (ORO) staining of liver sections (j, scale bars, 100  $\mu$ m). **k, l.** Western blotting was performed to detect endoplasmic reticulum stress markers (k,  $n = 5$ ), and qPCR analysis was conducted to assess the expression of inflammatory genes (l,  $n = 5$ ) in mouse livers under a KD. **m.** qPCR analysis for *de novo* lipogenesis genes ( $n = 4$ ). **n.** Primary hepatocytes from *Pak4* LKO and WT mice were incubated with octanoate (OCA, 2 mM) for 24 h, and  $\beta$ OHB was measured in the culture supernatants ( $n = 6$ ). Data are presented as the mean  $\pm$  SEM. Unpaired two-tailed  $t$  test was conducted for statistical analyses (e-h, k-n). Source data are provided as a Source Data file.



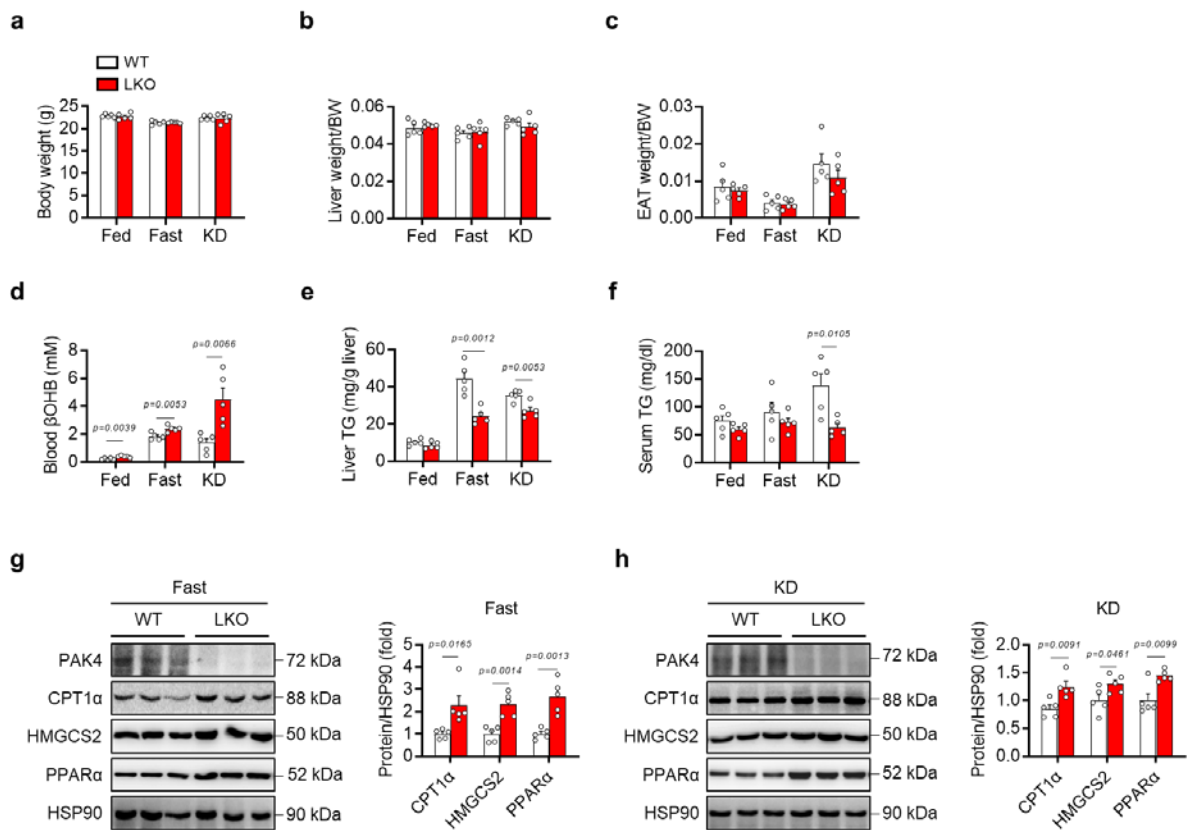

**Supplementary Figure 5. Metabolic profiles of female *Pak4* LKO and WT mice after fasting or ketogenic diet feeding (compare to Figure 3).** Eight-week-old female *Pak4* LKO and WT mice were fed normal chow ad libitum (Fed), fasted for 24 h (Fast), or fed a ketogenic diet (KD) for 2 weeks. **a-c.** Weights of the body (a), liver (b), and epididymal adipose tissue (EAT) (c). **d-f.** Blood levels of  $\beta$ OHB (d) and TG levels in the liver (e) and serum (f) were compared. **g, h.** Western blotting analysis of liver tissue obtained from *Pak4* LKO and WT mice after fasting (g,  $n = 5$ ) or KD-feeding (h,  $n = 5$ ). Data are presented as the mean  $\pm$  SEM. Unpaired two-tailed  $t$  test was conducted for statistical analyses (a–h). Source data are provided as a Source Data file.

**a**

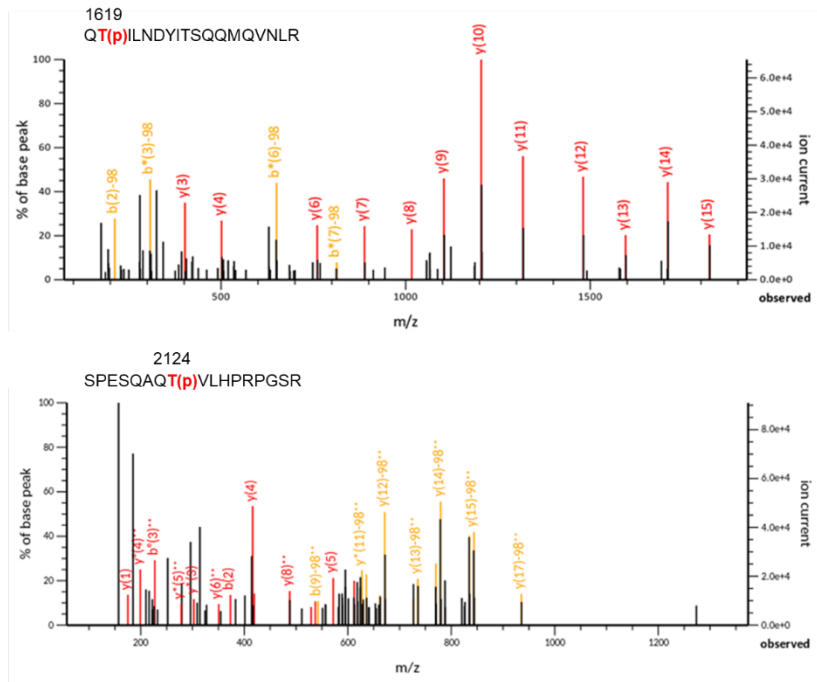

**b**

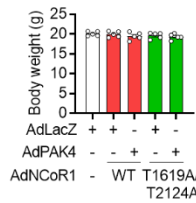

**c**

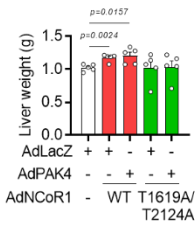

**d**

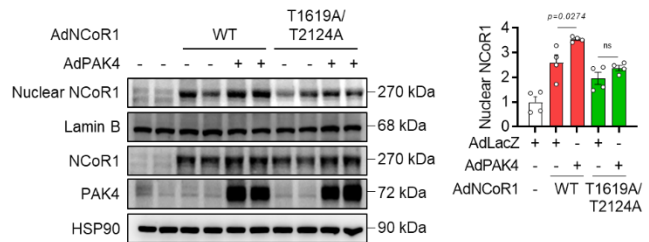

**Supplementary Figure 6. LC-MS/MS analysis for NCoR1 phosphorylation and metabolic phenotypes of mice injected with PAK4 and NCoR1 adenoviruses (compare to Figure 5).**

**a.** Recombinant PAK4 was incubated for 30 min with two different peptides comprising T1619 or T2124 of NCoR1 in kinase assay buffer. MS/MS spectra revealing the phosphorylation of NCoR1 at T1619 (top) and T2124 (bottom) were observed. **b-d.** The experimental procedures were identical to those described in the legend to Figure 5h-j. Body weight (**b**,  $n = 5$ ), liver weight (**c**,  $n = 5$ ), and the levels of NCoR1 in the nuclear fraction and in the whole lysates of liver tissues (**d**,  $n = 4$ ) were determined. Data are presented as the mean  $\pm$  SEM. Unpaired two-tailed  $t$  test was conducted for statistical analyses (**b-d**). Source data are provided as a Source Data file.

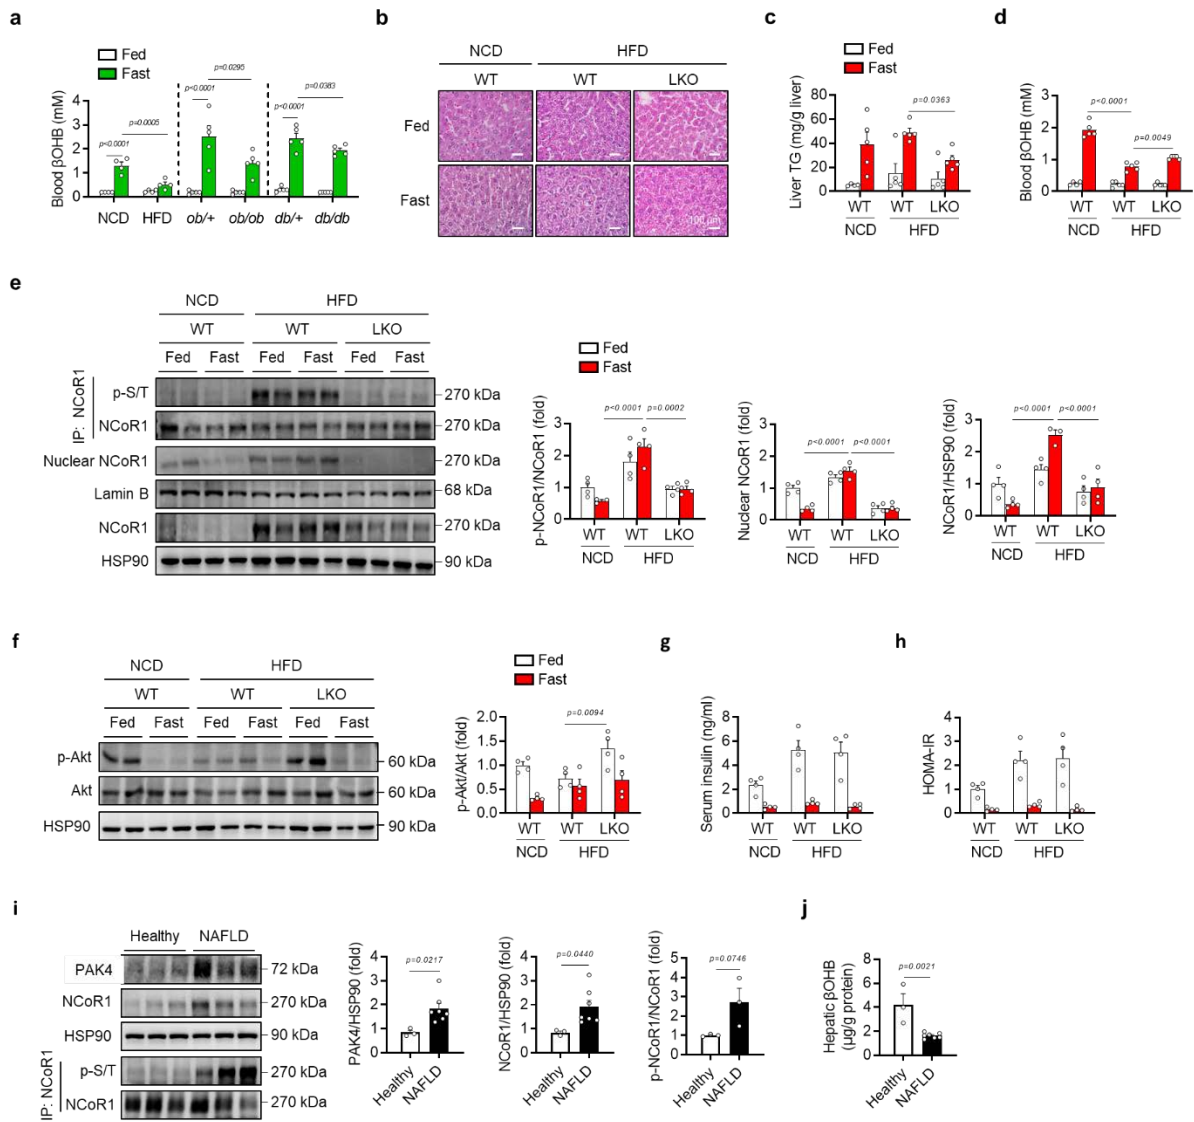

**Supplementary Figure 7. Defective ketogenesis in mice with fatty liver and NAFLD patients, associated with upregulations of PAK4 and NCoR1.** **a.** Blood levels of  $\beta$ OHB were analyzed in mice from 12-week HFD-fed ( $n = 4$ ), *ob/ob* ( $n = 5$ ), and *db/db* ( $n = 5$ ) male mice after *ad libitum* feeding (Fed) or 24-h fasting (Fast). **b-f.** Eight-week-old male *Pak4* LKO and WT mice were fed normal chow or HFD for 5 weeks. Hematoxylin and eosin (H&E) staining of liver sections (b, scale bars, 100  $\mu$ m), liver TG levels (c,  $n = 4$  for NCD Fed,  $n = 5$  for other groups), blood levels of  $\beta$ OHB (d,  $n = 4$  for NCD Fed,  $n = 5$  for other groups) and Western blot analysis of total- and phospho-NCoR1 (e,  $n = 4$ ), phospho-Akt (f,  $n = 4$ ) in liver tissues. **g.**

Serum levels of insulin were analyzed by ELISA ( $n = 4$ ). **h.** Homeostasis Model Assessment-insulin resistance (HOMA-IR) was calculated using the following formula:  $\text{HOMA-IR} = \text{fasting glucose (mg/dl)} \times \text{insulin } (\mu\text{U/ml})/405$  ( $n = 4$ ). **i, j.** PAK4 ( $n = 3$  for Healthy and  $n = 7$  for NAFLD) and total- ( $n = 3$  for Healthy and  $n = 7$  for NAFLD) and phospho-NCoR1 ( $n = 3$ ) protein levels (**i**) and  $\beta\text{OHB}$  levels in liver tissues (**j**,  $n = 3$  for Healthy and  $n = 7$  for NAFLD) from healthy adults or NAFLD patients. Data are presented as the mean  $\pm$  SEM. Two-way ANOVA followed by Tukey's multiple comparisons test (**a, c-h**), and unpaired two-tailed  $t$  test (**i, j**) were conducted for statistical analyses. Source data are provided as a Source Data file.

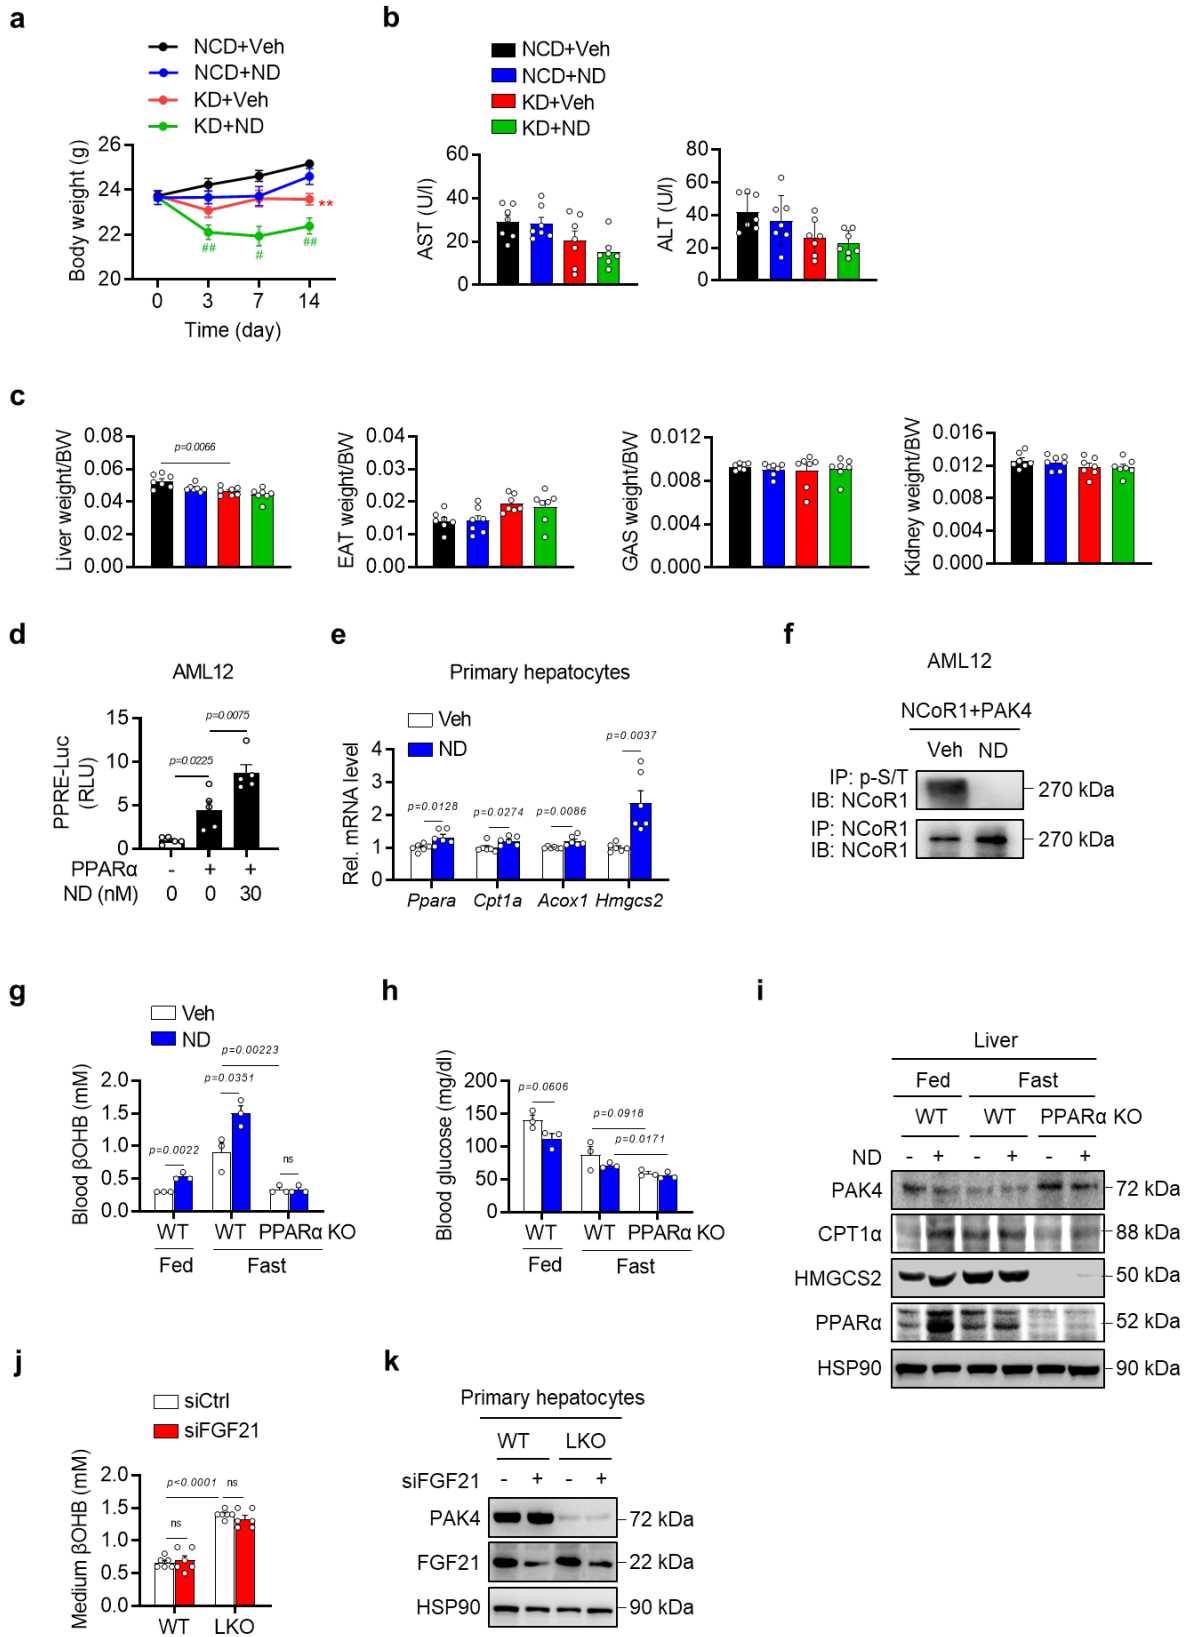

**Supplementary Figure 8. Metabolic phenotypes in male C57BL/6 mice or *Ppara* KO mice administered with PAK4 inhibitor ND201651 (compare to Figure 6).** **a.** Body weights of mice fed a normal chow or ketogenic diet (KD) during ND201651 (ND, 50 mg/kg) treatment were monitored at the indicated time periods ( $n = 7$ ). \* $p < 0.05$  versus NCD+Veh; # $p < 0.05$  versus KD+Veh. **b, c.** Serum levels of AST and ALT (b) and tissue weights of the liver, epididymal adipose tissue (EAT), gastrocnemius (GAS), and kidney normalized against body weight (c) were determined after 2 weeks of ND201651 treatment ( $n = 7$ ). **d.** AML12 cells were co-transfected with PPAR $\alpha$  expression plasmid and PPRE promoter luciferase plasmid, and subsequently treated with ND201651 (30 nM) for 24 h. PPRE-luciferase activities were measured and expressed as the fold change relative to mock ( $n = 5$ ). **e.** Mouse primary hepatocytes were treated with ND201651 (30 nM) for 24 h, and mRNA levels of  $\beta$ -oxidation and ketogenesis-related genes were analyzed by qPCR ( $n = 6$ ). **f.** AML12 cells were treated with ND201651 (30 nM) for 24 h after co-transfection with PAK4 and NCoR1. Phosphorylation of NCoR1 was analyzed by immunoblotting of NCoR1 following immunoprecipitation with anti- p-Ser/Thr antibody. **g-i.** *Ppara* KO mice and their littermates (WT) were orally administered ND201651 (50 mg/kg) once a day for 3 days. Blood levels of  $\beta$ OHB (g,  $n = 3$ ) and glucose (h,  $n = 3$ ), and protein levels of CPT1 $\alpha$ , HMGCS2 and PPAR $\alpha$  in liver tissues were analyzed after *ad libitum* feeding or 24 h fasting (i). **j, k.** *Pak4* LKO and WT hepatocytes were transfected with siRNA targeting FGF21 or control siRNA, and the medium  $\beta$ OHB concentration was assessed (j,  $n = 6$ ). Successful depletion of FGF21 was validated by Western blotting (k). Data are presented as the mean  $\pm$  SEM. One-way ANOVA followed by Tukey's multiple comparisons test (a–d) and unpaired two-tailed  $t$  test (e, g, h, j) were conducted for statistical analyses. Source data are provided as a Source Data file.

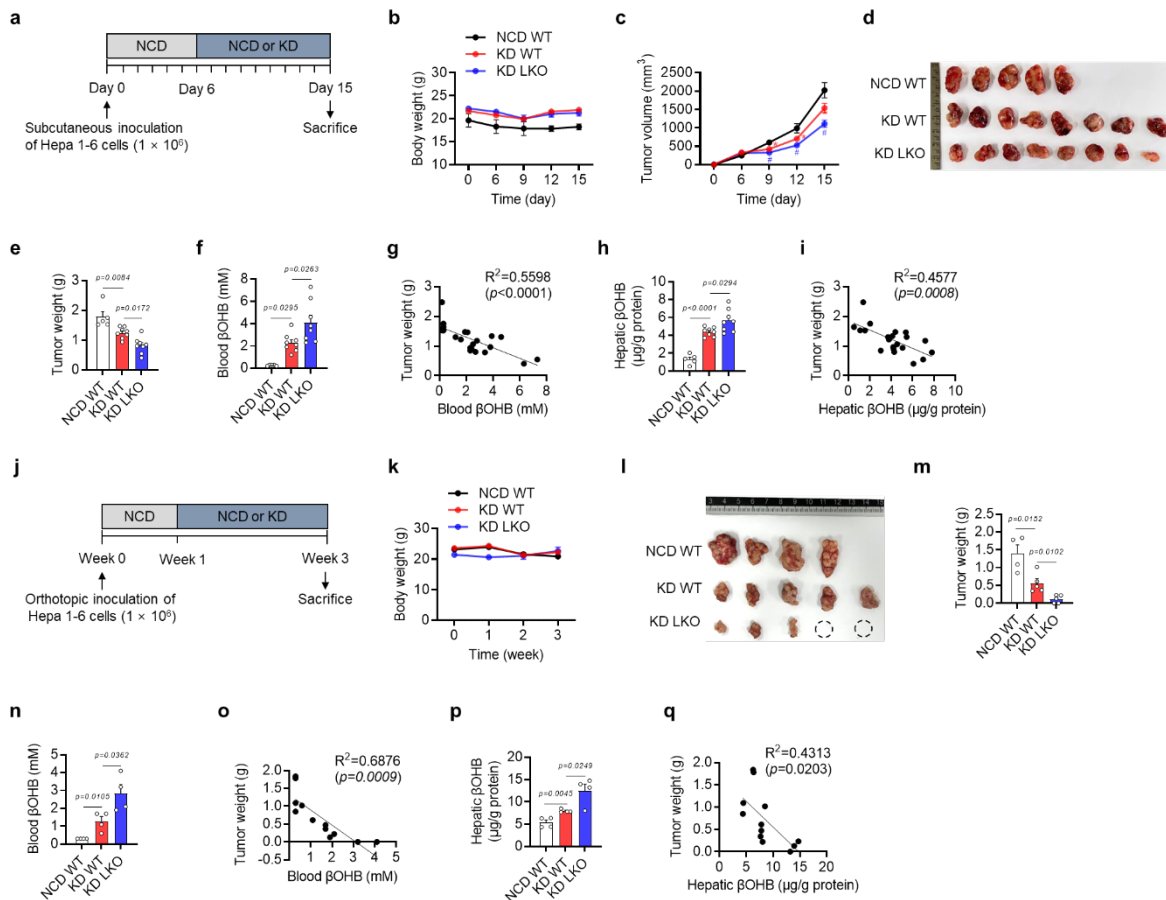

**Supplementary Figure 9. Suppression of extra- and intra-hepatic tumor growth in *Pak4* LKO mice.** **a, j.** Schematic of the extra- (a) and intra-hepatic (j) tumor implantation models using male *Pak4* LKO and WT mice fed a normal chow diet (NCD) or ketogenic diet (KD). **b, c.** Body weight (b) and tumor growth (c,  $n = 10$  for NCD and  $n = 18$  for KD) in *Pak4* LKO and WT mice. Tumor size was measured with electronic calipers and volumes were determined using the following formula: length (mm)  $\times$  width (mm)<sup>2</sup>  $\times$  0.5. \* $p<0.05$  versus NCD WT; # $p<0.05$  versus KD WT. **d, e.** Representative gross images of tumors (d) and tumor weights (e) at the end of the study. **f, g.** Blood  $\beta$ OHB levels (f) and its correlation with tumor weight (g,  $n = 21$ ). **h, i.** Hepatic  $\beta$ OHB levels (h) and its correlation with tumor weight (i,  $n = 21$ ).  $n = 5$  for NCD and  $n = 8$  for KD in b, e, f and h. **k-m.** Body weight change (k), gross images of tumors (l) and tumor weights (m) at the end of the study.  $n = 4$  for NCD and  $n = 5$  for KD in k and m. **n, o.** blood  $\beta$ OHB levels (n,  $n = 4$ ) and its correlation with tumor weight (o,  $n = 12$ ). **p, q.**

Hepatic  $\beta$ OHB levels (p,  $n = 4$ ) and its correlation with tumor weight (q,  $n = 12$ ). Data are presented as the mean  $\pm$  SEM. One-way ANOVA followed by Tukey's multiple comparisons test (b, c, e, f, h, k, m, n, p) was conducted for statistical analyses. The Pearson correlation coefficients were calculated between continuous variables (g, i, o, q). Source data are provided as a Source Data file.



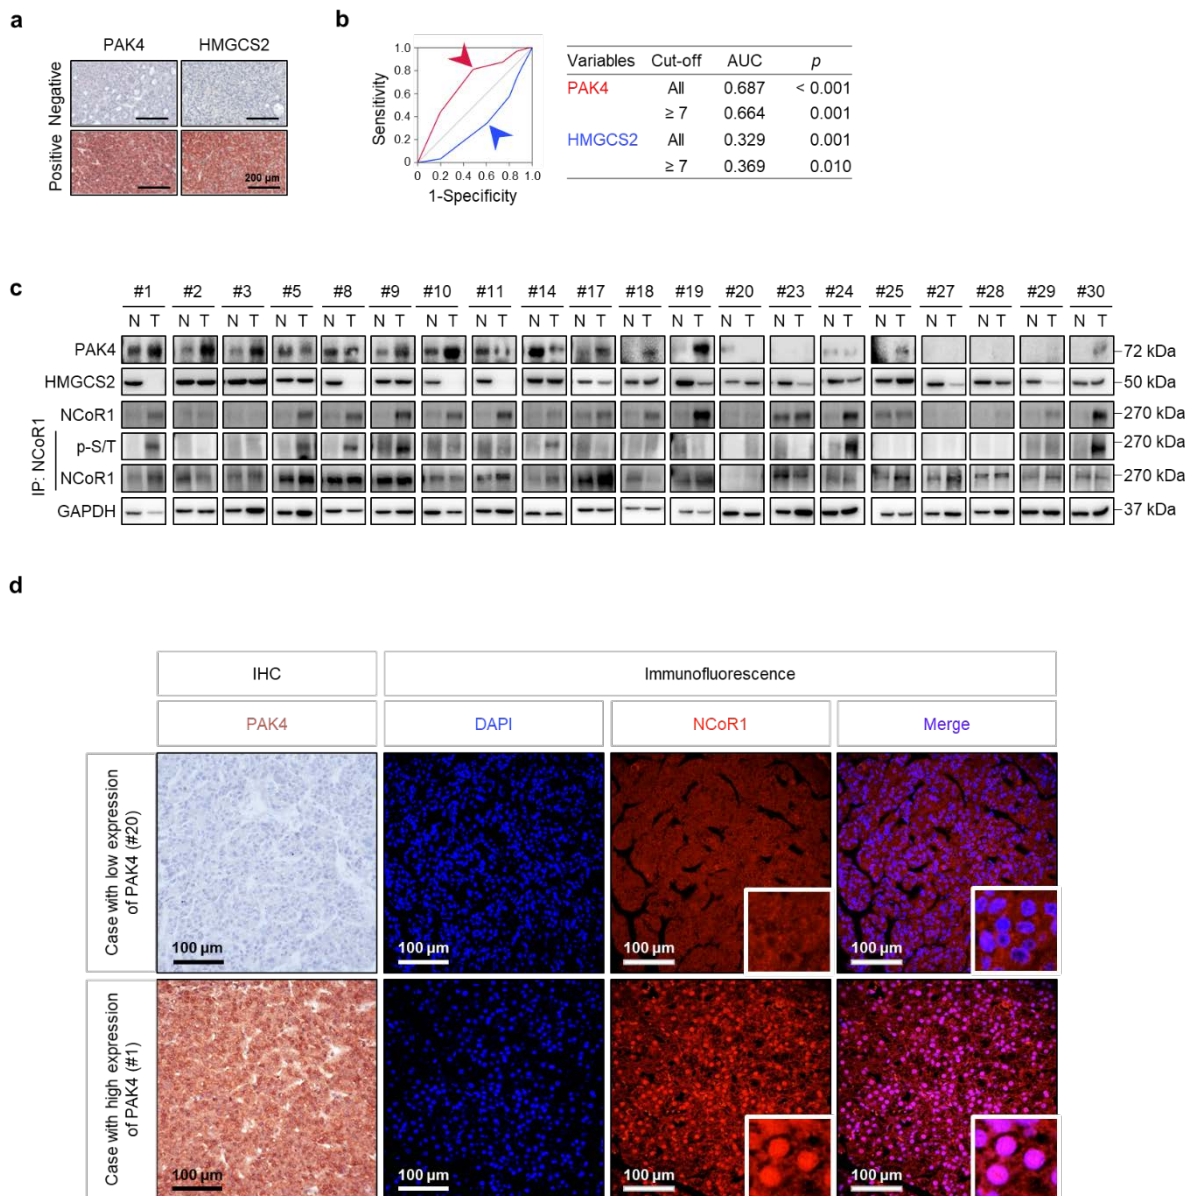

**Supplementary Figure 10 (compare to Figure 7). Hepatic expression of PAK4, HMGCS2, and NCoR1 in hepatocellular carcinoma (HCC) patients.** **a.** Representative immunohistochemical staining images for PAK4 and HMGCS2 in liver sections of patients with HCC. **b.** The cut-off points for PAK4 and HMGCS2 expression were determined based on a receiver operating characteristic curve analysis. The cut-off points for PAK4 (red arrow) and HMGCS2 (blue arrow) were both 7 (AUC, area under the curve). **c.** Immunoblotting for the indicated proteins in non-tumor (N) and tumor (T) liver tissues in HCC patients. NCoR1

phosphorylation was analyzed by immunoblotting with anti-p-Ser/Thr antibody following immunoprecipitation with anti-NCoR1 antibody. GAPDH was used as a loading control. **d.** The expression of NCoR1 in the nucleus in cases of low- and high-expression of PAK4 in HCC tissues. The *p*-value in ROC curve (b) analysis is one-sided.

## 2. Supplementary Tables

**Supplementary Table 1.** Clinicopathologic variables and the expression of PAK4 and HMGCS2 in 130 hepatocellular carcinomas

| Characteristics   |          | No. | PAK4     |          | HMGCS2   |          |
|-------------------|----------|-----|----------|----------|----------|----------|
|                   |          |     | Positive | <i>p</i> | Positive | <i>p</i> |
| Sex               | Male     | 114 | 77 (68%) | 0.062    | 52 (46%) | 0.205    |
|                   | Female   | 16  | 7 (44%)  |          | 10 (63%) |          |
| Age (year)        | ≤ 60     | 76  | 44 (58%) | 0.057    | 40 (53%) | 0.181    |
|                   | > 60     | 54  | 40 (74%) |          | 22 (41%) |          |
| AFP (ng/ml)       | < 100    | 92  | 58 (63%) | 0.560    | 44 (48%) | 0.962    |
|                   | ≥ 100    | 38  | 26 (68%) |          | 18 (47%) |          |
| HBV               | Negative | 36  | 23 (64%) | 0.915    | 13 (36%) | 0.102    |
|                   | Positive | 94  | 61 (65%) |          | 49 (52%) |          |
| HCV               | Negative | 122 | 79 (65%) | 0.897    | 59 (48%) | 0.551    |
|                   | Positive | 8   | 5 (63%)  |          | 3 (38%)  |          |
| Liver cirrhosis   | Absence  | 70  | 51 (73%) | 0.034    | 34 (49%) | 0.828    |
|                   | Presence | 60  | 33 (55%) |          | 28 (47%) |          |
| Bilirubin (mg/dl) | < 0.7    | 59  | 38 (64%) | 0.964    | 28 (47%) | 0.961    |
|                   | ≥ 0.7    | 71  | 46 (65%) |          | 34 (48%) |          |
| Albumin (mg/dl)   | < 3.5    | 116 | 77 (66%) | 0.226    | 57 (49%) | 0.342    |
|                   | ≥ 3.5    | 14  | 7 (50%)  |          | 5 (36%)  |          |
| Tumor stage       | I        | 50  | 27 (54%) | 0.023    | 22 (44%) | 0.220    |
|                   | II       | 49  | 31 (63%) |          | 28 (57%) |          |
|                   | III & IV | 31  | 26 (84%) |          | 12 (39%) |          |
| Histologic grade  | Low      | 78  | 49 (63%) | 0.600    | 37 (47%) | 0.943    |
|                   | High     | 52  | 35 (67%) |          | 25 (48%) |          |
| HMGCS2            | Negative | 68  | 43 (63%) | 0.730    |          |          |
|                   | Positive | 62  | 41 (66%) |          |          |          |

Abbreviations: AFP,  $\alpha$ -fetoprotein; HBV, hepatitis B virus; HCV, hepatitis C virus

The *p*-value in ROC curve analysis is two-sided

**Supplementary Table 2.** Univariate and multivariate Cox regression analysis for the survival in hepatocellular carcinoma patients

| Characteristics                         | No.     | OS                  |          | RFS                 |          |
|-----------------------------------------|---------|---------------------|----------|---------------------|----------|
|                                         |         | HR (95% CI)         | <i>p</i> | HR (95% CI)         | <i>p</i> |
| Univariate Cox regression analysis      |         |                     |          |                     |          |
| Sex, male (vs female)                   | 114/130 | 0.691 (0.298-1.604) | 0.390    | 0.880 (0.441-1.758) | 0.717    |
| Age, > 60 (vs ≤ 60)                     | 54/130  | 1.823 (1.109-2.995) | 0.018    | 1.580 (1.032-2.417) | 0.035    |
| AFP, ≥ 100 ng/ml (vs < 100 ng/ml)       | 38/130  | 1.727 (1.035-2.880) | 0.036    | 1.988 (1.283-3.081) | 0.002    |
| Albumin, < 3.5 mg/dl (vs ≥ 3.5 mg/dl)   | 116/130 | 1.812 (0.892-3.681) | 0.100    | 1.582 (0.839-2.982) | 0.156    |
| Bilirubin, ≥ 0.7 mg/dl (vs < 0.7 mg/dl) | 71/130  | 1.102 (0.673-1.804) | 0.699    | 1.019 (0.668-1.554) | 0.931    |
| Tumor stage, I                          | 50/130  | 1                   | 0.002    | 1                   | < 0.001  |
| II                                      | 49/130  | 1.713 (0.919-3.193) | 0.090    | 1.633 (0.973-2.743) | 0.064    |
| III & IV                                | 31/130  | 3.109 (1.658-5.830) | < 0.001  | 3.068 (1.782-5.283) | < 0.001  |
| Histologic grade, high (vs low)         | 52/130  | 1.429 (0.869-2.350) | 0.160    | 1.508 (0.983-2.312) | 0.060    |
| HMGCS2, negative (vs positive)          | 68/130  | 1.877 (1.118-3.149) | 0.017    | 1.540 (1.001-2.369) | 0.049    |
| PAK4, positive (vs negative)            | 84/130  | 3.082 (1.643-5.781) | < 0.001  | 2.770 (1.661-4.618) | < 0.001  |
| Multivariate Cox regression analysis*   |         |                     |          |                     |          |
| Age, > 60 (vs ≤ 60)                     |         |                     |          | 1.780 (1.110-2.854) | 0.017    |
| AFP, ≥ 100 ng/ml (vs < 100 ng/ml)       |         |                     |          | 1.981 (1.245-3.151) | 0.004    |
| Tumor stage, I                          |         | 1                   | 0.051    | 1                   | 0.013    |
| II                                      |         | 1.630 (0.870-3.052) | 0.127    | 1.359 (0.801-2.307) | 0.256    |
| III & IV                                |         | 2.237 (1.169-4.281) | 0.015    | 2.337 (1.314-4.157) | 0.004    |
| HMGCS2, negative (vs positive)          |         | 1.989 (1.180-3.351) | 0.010    |                     |          |
| PAK4, positive (vs negative)            |         | 2.710 (1.414-5.191) | 0.003    | 2.235 (1.317-3.793) | 0.003    |

Abbreviations: HBV, hepatitis B virus; HCV, hepatitis C virus; AFP,  $\alpha$ -fetoprotein; HR, hazard ratio; 95% CI, 95% confidence interval. \* Variables considered analysis were age, TNM stage, AFP level, and the expression of PAK4 and HMGCS2.

In multivariate survival analysis with Cox regression analysis, adjustments are made for multiple comparisons by using Bonferroni correction. Multivariate analysis was performed with the factors significantly associated with OS and RFS in univariate analysis.

**Supplementary Table 3.** Antibodies used for Western blotting, immunofluorescence and immunohistochemical analyses

| Antibody                                  | Catalogue No. | Dilution Fold | Company                   |
|-------------------------------------------|---------------|---------------|---------------------------|
| <b>Western Blot</b>                       |               |               |                           |
| PAK4 (G222)                               | 62690         | 1:2500        | Cell Signaling Technology |
| p-PAK4 (S474)                             | 3241          | 1:2500        | Cell Signaling Technology |
| HSP90 (C45G5)                             | 4877          | 1:2500        | Cell Signaling Technology |
| Ubiquitin (E4I2J)                         | 43124         | 1:2500        | Cell Signaling Technology |
| HMGCS2 (D3U1A)                            | 20940         | 1:2500        | Cell Signaling Technology |
| Phospho-PKA Substrate (100G7E)            | 9624          | 1:2500        | Cell Signaling Technology |
| Phospho-(Ser/Thr)                         | 9631          | 1:2500        | Cell Signaling Technology |
| Sirt1                                     | 2310          | 1:2500        | Cell Signaling Technology |
| Sirt6 (D8D12)                             | 12486         | 1:2500        | Cell Signaling Technology |
| Phospho-Akt (Ser473) (D9E)                | 4060          | 1:2500        | Cell Signaling Technology |
| Akt                                       | 9272          | 1:2500        | Cell Signaling Technology |
| Acetylated-Lysine                         | 9441          | 1:2500        | Cell Signaling Technology |
| CHOP (L63F7)                              | 2895          | 1:2500        | Cell Signaling Technology |
| Phospho-S6 Ribosomal Protein (Ser240/244) | 2215          | 1:2500        | Cell Signaling Technology |
| S6 Ribosomal Protein (5G10)               | 2217          | 1:2500        | Cell Signaling Technology |
| NCoR1                                     | 5948          | 1:2500        | Cell Signaling Technology |
| NEDD4                                     | 2740          | 1:2500        | Cell Signaling Technology |
| ATF-6 (D4Z8V)                             | 65880         | 1:2500        | Cell Signaling Technology |
| Phospho-PERK (Thr980) (16F8)              | 3179          | 1:2500        | Cell Signaling Technology |
| PAK4 (B-3)                                | SC-390507     | 1:2500        | Santa Cruz Biotechnology  |
| FGF21 (H-105)                             | SC-292879     | 1:2500        | Santa Cruz Biotechnology  |
| PPAR $\alpha$ (H-2)                       | SC-398394     | 1:2500        | Santa Cruz Biotechnology  |
| Sirt4                                     | 3224          | 1:2500        | Bioworld Technology       |
| LaminB1 (L75)                             | BS3547        | 1:2500        | Bioworld Technology       |
| GAPDH (A531)                              | AP0066        | 1:2500        | Bioworld Technology       |
| Sirt5 (aa30-46)                           | LS-B2060      | 1:2500        | LifeSpan Biosciences      |
| Sirt7 ( aa317-366)                        | LS-B1566      | 1:2500        | LifeSpan Biosciences      |
| FoxO1 (Acetyl-Lys294)                     | LS-C800723    | 1:2500        | LifeSpan Biosciences      |
| Sirt2 (EPR20411-105)                      | ab211033      | 1:2500        | Abcam                     |
| Sirt3                                     | ab189860      | 1:2500        | Abcam                     |
| GRP78 BiP                                 | ab21685       | 1:2500        | Abcam                     |
| NCOR2/SMRT                                | ab24551       | 1:2500        | Abcam                     |
| CPT1A (8F6AE9)                            | ab128568      | 1:2500        | Abcam                     |
| T-OXPHOS                                  | ab110413      | 1:2500        | Abcam                     |
| THR $\beta$                               | ab53170       | 1:2500        | Abcam                     |
| p-IRE1 $\alpha$                           | ab48187       | 1:2500        | Abcam                     |
| MDM2 (2A10)                               | ab16895       | 1:2500        | Abcam                     |
| LXR $\alpha$                              | 14351-1-AP    | 1:2500        | Proteintech               |
| <b>Proximity Ligation Assay</b>           |               |               |                           |
| NCoR1                                     | 5948          | 1:100         | Cell Signaling Technology |
| p300 (D8Z4E)                              | 86377         | 1:100         | Cell Signaling Technology |
| PPAR $\alpha$ (H-2)                       | SC-398394     | 1:100         | Santa Cruz Biotechnology  |
| <b>Immunofluorescence</b>                 |               |               |                           |
| NCoR1                                     | 5948          | 1:100         | Cell Signaling Technology |
| PPAR $\alpha$ (H-2)                       | SC-398394     | 1:100         | Santa Cruz Biotechnology  |

**Supplementary Table 4.** Information for primers (forward, FOR; reverse, REV)

| Gene (qPCR)        | Sequences for primers                                          | Accession No. |
|--------------------|----------------------------------------------------------------|---------------|
| <i>Pak4</i>        | FOR: GCTCCCCTTTGAAGATGTCA<br>REV: GACCCACAAGGACTCAAGGA         | NM_027470     |
| <i>Ppara</i>       | FOR: CAGTGGGGAGAGAGGACAGA<br>REV: AGTTCGGGAACAAGACGT TG        | NM_133947     |
| <i>Cpt1a</i>       | FOR: TTGGAAGTCTCCCTCCTTCA<br>REV: GCCCATGTTGTACAGCTTCC         | NM_013495     |
| <i>Acox1</i>       | FOR: CCTGATTCAGCAAGGTAGGG<br>REV: TCGCAGACCCTGAAGAAATC         | NM_015729     |
| <i>Hmgcs2</i>      | FOR: TGGTTCAAGACAGGGACACAGAAC<br>REV: AGAGGAATACCAGGGCCCAACAAT | NM_008256     |
| <i>Acat1</i>       | FOR: GGCTGGTGCAGGAAATAAGA<br>REV: GGAATCCCTGCCTTTTCAAT         | NM_144784     |
| <i>Hmgcl</i>       | FOR: ACCACCAGCTTTGTGTCTCC<br>REV: GAGGCAGCTCCAAAGATGAC         | NM_008254     |
| <i>Bdh1</i>        | FOR: GCTTCCAGCGTCAAAGGAGTT<br>REV: CAGTTGCGAATCTTCCCCTC        | NM_175177     |
| <i>Acaca</i>       | FOR: ACCGCAAGCAGATCTACAAC<br>REV: TGGGGTGCAGCTTGATCA           | NM_133360     |
| <i>Fasn</i>        | FOR: GGAGGTGGTGATAGCCGGTAT<br>REV: TGGGTAATCCATAGAGCCCAG       | NM_007988     |
| <i>Nr1h3</i>       | FOR: AAGCCCTGCATGCCTACGT<br>REV: TGCAGACGCAGTGCAACA            | NM_001177730  |
| <i>Scd1</i>        | FOR: CCATCGCCTGTGGAGTCAC<br>REV: GTCGGATAAATCTAGCGTAGCA        | NM_009127     |
| <i>Srebf1</i>      | FOR: ACAGCCGCCCTTCAAGTG<br>REV: TCACAGGCATTGTGGTCAGAA          | NM_001313979  |
| <i>Tnf</i>         | FOR: CCCGAGTGACAAGCCTGTAG<br>REV: GATGGCAGAGAGGAGGTTGAC        | NM_001278601  |
| <i>Ccl2</i>        | FOR: AAAGTCTCTGCCGCCCTTCT<br>REV: GATTGCATCTGGCTGAGCG          | NM_011333     |
| <i>Il6</i>         | FOR: ACAGCCACTCACCTCTTCAG<br>REV: CCATCTTTTTCAGCCATCTTT        | NM_001314054  |
| <i>Il1b</i>        | FOR: AGATGATAAGCCACTCTACAG<br>REV: ACATTCAGCACAGGACTCTC        | NM_008361     |
| <i>Ccl5</i>        | FOR: GATGGACATAGAGGACACAAC<br>REV: TGGGACGGCAGATCTGAGGG        | NM_013653     |
| <i>Actb</i>        | FOR: ATGGAGGGGAATACAGCC<br>REV: TTCTTTGCAGCTCCTTCGTT           | NM_007393     |
| Gene (Chip)        | Sequences for primers                                          |               |
| <i>Ppara</i> PPRE  | FOR: TTCCGAACCATTCTTTCCAG<br>REV: GCTGCCTTCTTTGCAGAGT          |               |
| <i>Cpt1a</i> PPRE  | FOR: CTTTCCTACTGAGGCCAGATAG<br>REV: TACAGCCTAGAACCCTGACTG      |               |
| <i>Hmgcs2</i> PPRE | FOR: TGAGCCACTCAGCAGAGGAATCAG<br>REV: CTGGGTTGGGCTTTATAAGACTCC |               |

**Supplementary Table 5.** Identification of phosphorylation sites in NCoR1 by LC-MS/MS

| Sequence             | Charge state  | Monoisotopic mass |
|----------------------|---------------|-------------------|
| QT(p)ILNDYITSQQMQVNL | $[M+2H]^{2+}$ | 1123.0378         |
| SPESQAQT(p)VLHPRPGSR | $[M+3H]^{3+}$ | 642.9776          |
